# Supplementary material for: An improved estimation of tRNA expression to better elucidate the coevolution between tRNA abundance and codon usage in bacteria
Source: PubMed Central journal article supplement (PMC6395768; doi:10.1038/s41598-019-39369-x), 2019-02-28
Supplement: 41598_2019_39369_MOESM4_ESM.pdf [file 41598_2019_39369_MOESM4_ESM.pdf]

**An improved estimation of tRNA expression to better elucidate the coevolution between tRNA abundance and codon usage in bacteria**

Yulong Wei<sup>1,+</sup>, Jordan R. Silke<sup>1,+</sup>, Xuhua Xia<sup>1,2,\*</sup>

1. Department of Biology, University of Ottawa, 30 Marie Curie, P.O. Box 450, Station A, Ottawa, Ontario, Canada, K1N 6N5. Tel: (613) 562-5800 ext. 6886, Fax: (613) 562-5486.

2. Ottawa Institute of Systems Biology, Ottawa, Ontario, Canada K1H 8M5.

\* Corresponding author E-mail: [xxia@uottawa.ca](mailto:xxia@uottawa.ca)

+ Equal contribution.

# tRNA Availability

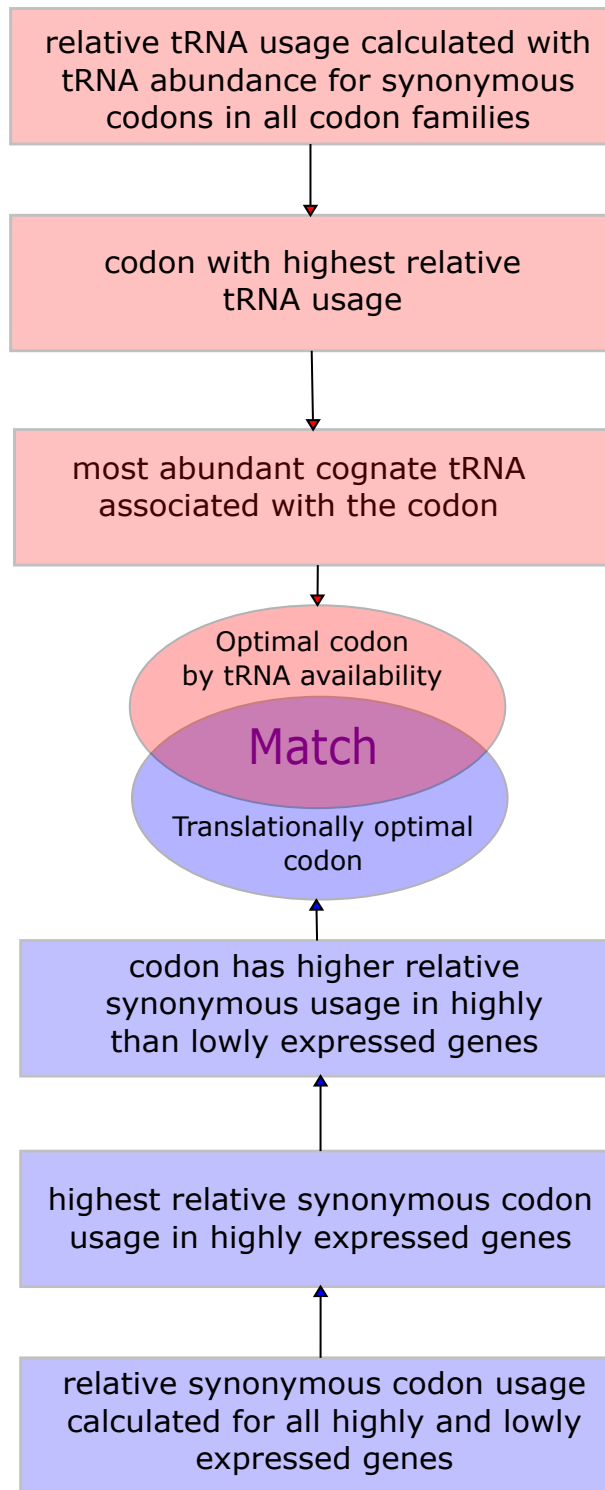

# Codon Usage

Supplementary Figure S1. Flowchart demonstrating the optimal codon designation through both tRNA availability and codon usage.

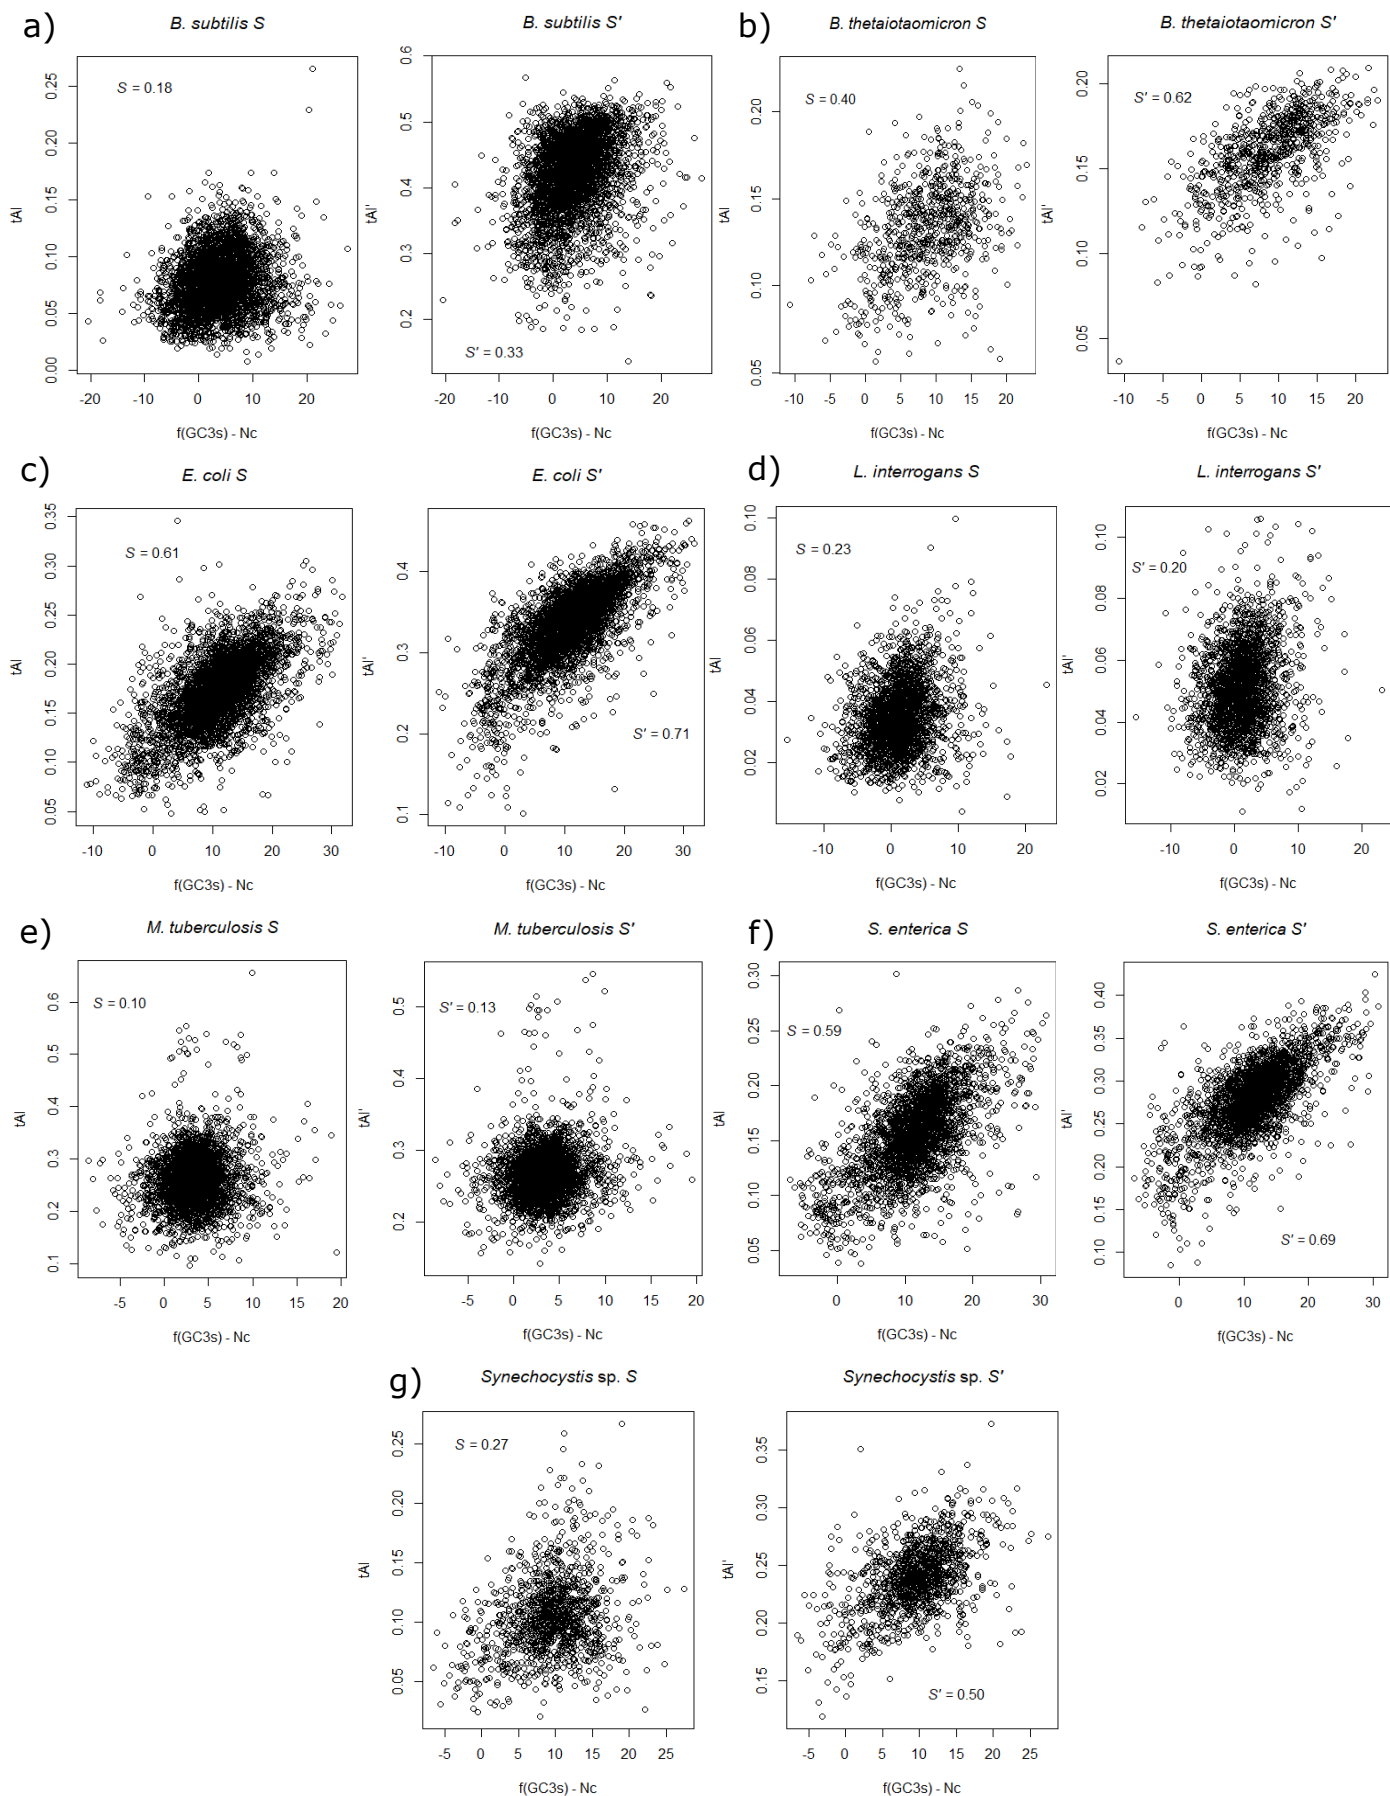

Supplementary Figure S2. The relationship between the corrected Nc and tAI/tAI' values for all seven species. The S or S' correlation coefficients are shown on each plot. Within each species, tAI and tAI' differ significantly from one another ( $p < 0.0001$ ).

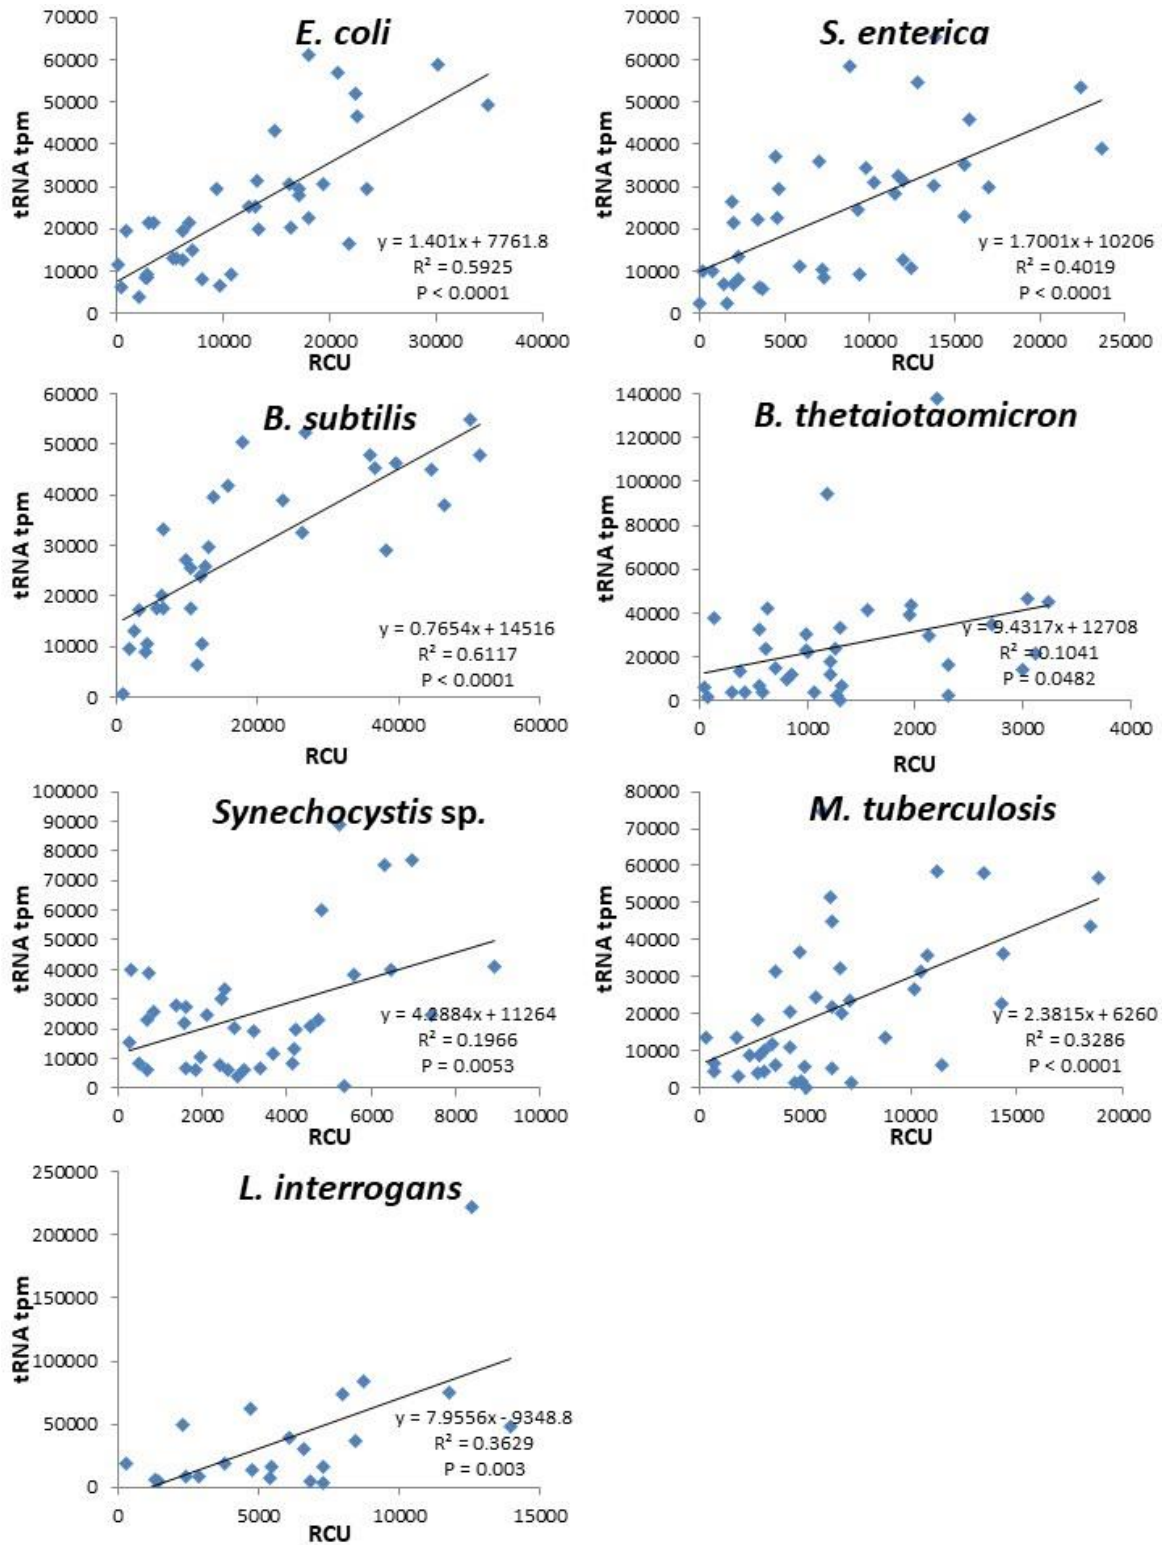

Supplementary Figure S3. Relationship between readable codon usage (RCU) and tRNA tpm in HEGs determined by protein per transcript, in three fast-growing species and four slow-growing species.

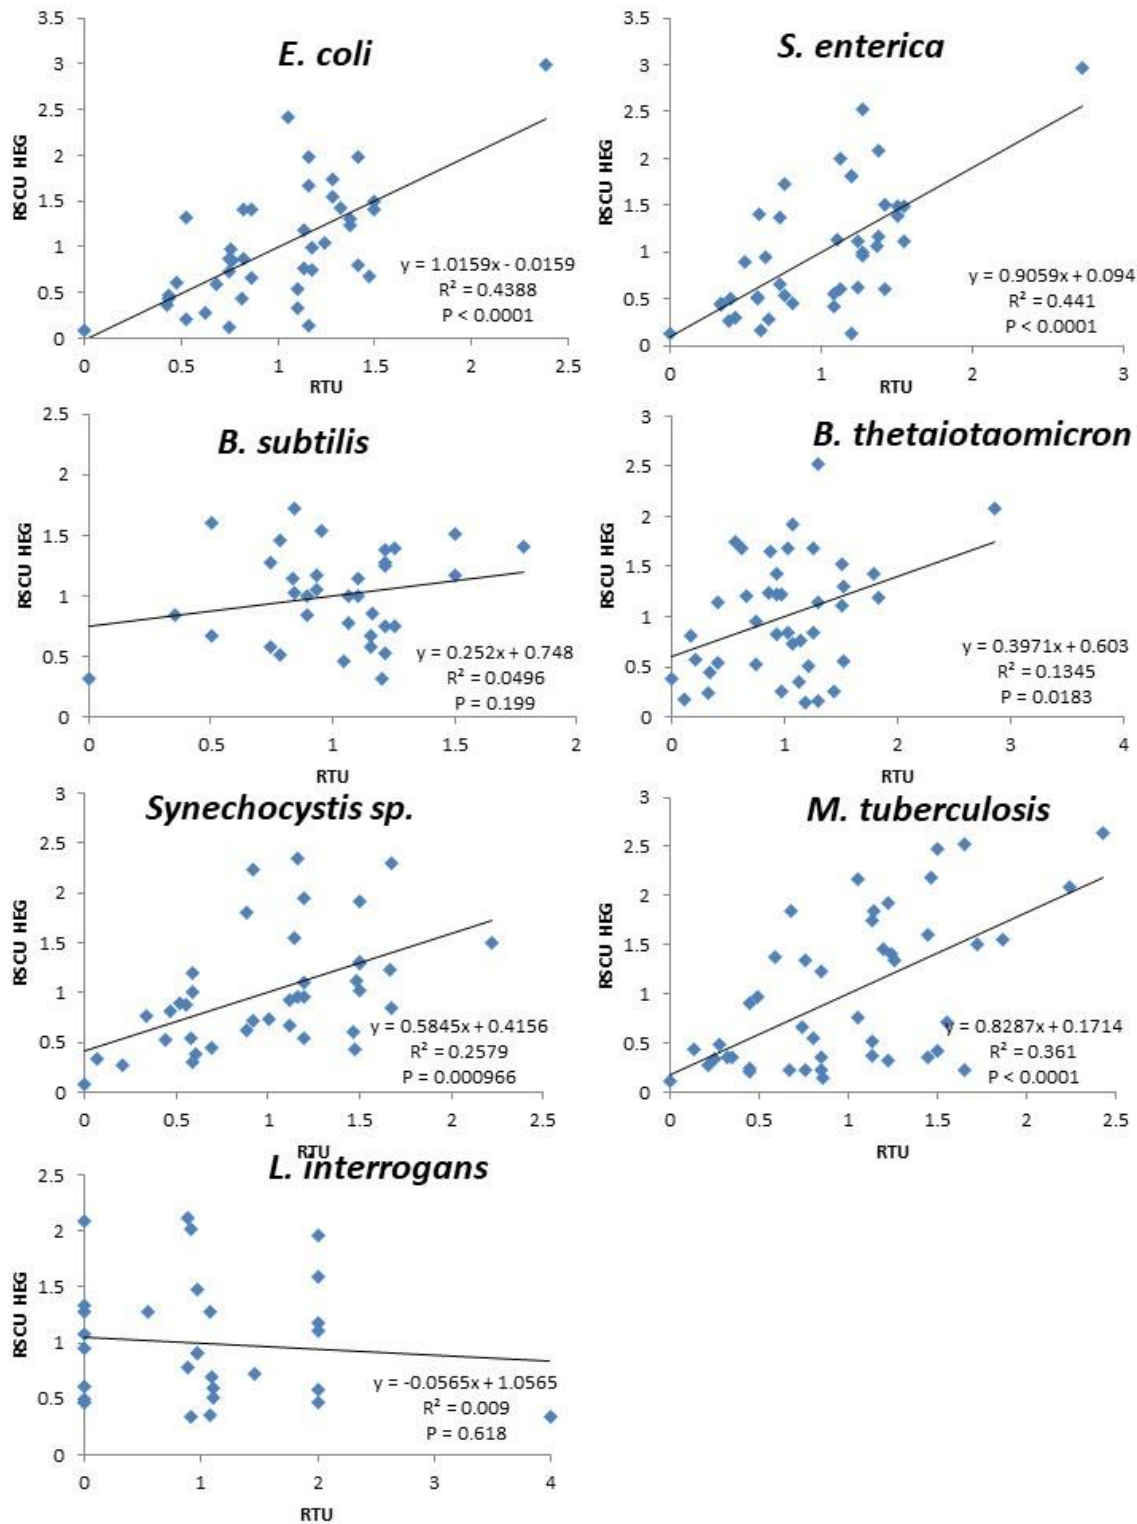

Supplementary Figure S4. Relationship between relative tRNA tpm usage (TPU) and RSCU in HEGs determined by protein per transcript, in three fast-growing species and four slow-growing species. Synonymous codons with RTU = 1 are due to lack difference in total readable (cognate and wobble pairing) tRNA tpm, they are omitted.

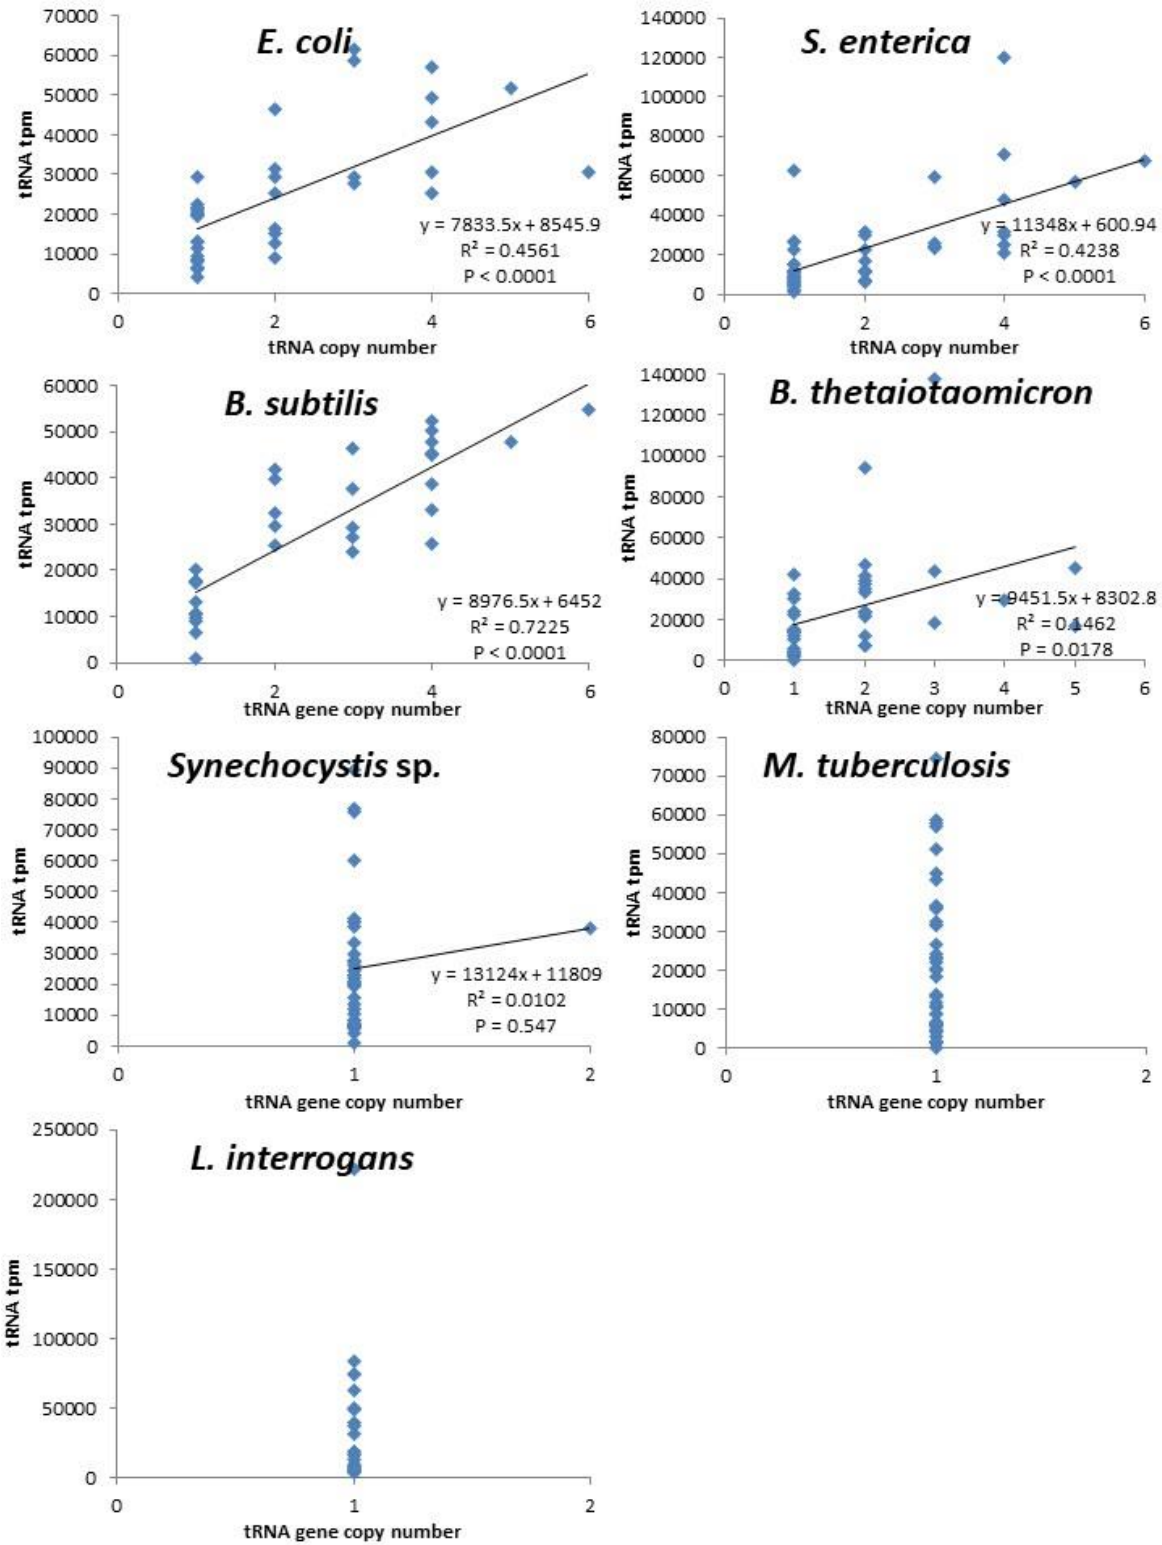

Supplementary Figure S5. Relationship between relative tRNA gene copy number and tRNA tpm values in three fast-growing species and four slow-growing species.

Supplementary Table S1. Number of genes determined to be translationally highly expressed (HEG) and lowly expressed (LEG) based on protein per transcript. The selected HEGs and LEGs are all genes found in the top and bottom 30% of genes by protein per transcript, respectively, for both datasets of each species (by SRX ID). The numbers of ribosomal protein genes contained in top and bottom 30% ppm/tpm gene sets are also shown for each dataset (by SRX ID).

| Species                    | SRX ID     | Number of genes |                    | Ribosomal protein genes |                    |                       | Matching genes between the both gene sets |                |
|----------------------------|------------|-----------------|--------------------|-------------------------|--------------------|-----------------------|-------------------------------------------|----------------|
|                            |            | Top 30% ppm/tpm | Bottom 30% ppm/tpm | Number of genes         | In top 30% ppm/tpm | In bottom 30% ppm/tpm | Number of HEGs                            | Number of LEGs |
| <i>E. coli</i>             | SRX515174  | 1110            | 1110               | 57                      | 50                 | 0                     | 976                                       | 962            |
|                            | SRX669653  | 1119            | 1119               |                         | 55                 | 0                     |                                           |                |
| <i>B. subtilis</i> *       | SRX515181  | 1056            | 1056               | 57                      | 42                 | 0                     | 1056                                      | 1056           |
|                            | SRX2804667 | N/A             | N/A                |                         | 23                 | 0                     |                                           |                |
| <i>B. thetaiotaomicron</i> | SRX020805  | 186             | 186                | 55                      | 17                 | 5                     | 114                                       | 150            |
|                            | SRX860738  | 230             | 230                |                         | 24                 | 1                     |                                           |                |
| <i>L. interrogans</i>      | SRX2448246 | 735             | 735                | 54                      | 39                 | 1                     | 505                                       | 543            |
|                            | SRX405952  | 672             | 672                |                         | 31                 | 1                     |                                           |                |
| <i>M. tuberculosis</i>     | SRX1372108 | 995             | 995                | 58                      | 48                 | 4                     | 866                                       | 901            |
|                            | SRX4374910 | 996             | 996                |                         | 48                 | 3                     |                                           |                |
| <i>S. enterica</i>         | SRX1638989 | 866             | 866                | 59                      | 45                 | 1                     | 649                                       | 646            |
|                            | SRX1258668 | 784             | 784                |                         | 52                 | 0                     |                                           |                |
| <i>Synechocystis sp.</i>   | SRX347145  | 400             | 400                | 55                      | 43                 | 1                     | 306                                       | 308            |
|                            | SRX4145044 | 360             | 360                |                         | 42                 | 1                     |                                           |                |

\*- *B. subtilis* SRX2804667 was not considered due to Illumina MiSeq protocol removing large RNA transcripts (e.g. protein-coding gene transcripts).
